# Supplementary material
Source: MDPI journal article supplement (https://www.mdpi.com/2076-3417/12/15/7623)
Supplement: s1 [file s1]

**Table S2.** Statistics of lung sound files and labels in the HF\_Lung\_V1 and HF\_Lung\_V2 databases grouped by recording devices.

| Database                  |                        | HF_Lung_V1              |                        | HF_Lung_V2              |                          |
|---------------------------|------------------------|-------------------------|------------------------|-------------------------|--------------------------|
| Recording Device          |                        | Littmann 3200           | HF-Type-1              | Littmann 3200           | HF-Type-1                |
| Subjects                  |                        | 261                     | 18                     | 300                     | 25                       |
| No. of 15-sec. recordings |                        | 4504                    | 5261                   | 5156                    | 8801                     |
| Total duration (min)      |                        | 1126                    | 1315.25                | 1289                    | 2200.25                  |
| I                         | No.                    | 16535                   | 17560                  | 18887                   | 30486                    |
|                           | Duration (min)         | 257.17                  | 271.02                 | 294.27                  | 491.21                   |
|                           | Mean (sec)             | 0.93                    | 0.93                   | 0.93                    | 0.97                     |
| E                         | No.                    | 9107                    | 9242                   | 10480                   | 14072                    |
|                           | Duration (min)         | 160.25                  | 132.6                  | 182.96                  | 191.28                   |
|                           | Mean (sec)             | 1.06                    | 0.86                   | 1.05                    | 0.82                     |
| C                         | No. C/W/S/R            | 6984/3974/152/2858      | 6899/4483/534/1882     | 9184/5068/366/3750      | 12374/8071/548/3755      |
|                           | Duration (min) C/W/S/R | 105.90/63.92/1.94/40.04 | 85.26/55.80/7.52/21.94 | 132.93/78.04/5.21/49.68 | 159.92/108.92/7.61/43.39 |
|                           | Mean (sec) C/W/S/R     | 0.91/0.97/0.76/0.84     | 0.74/0.75/0.85/0.70    | 0.87/0.92/0.85/0.79     | 0.78/0.81/0.83/0.69      |
| D                         | No.                    | 7266                    | 8340                   | 7311                    | 12306                    |
|                           | Duration (min)         | 111.75                  | 55.8                   | 112.32                  | 169.23                   |
|                           | Mean (sec)             | 0.92                    | 0.87                   | 0.92                    | 0.83                     |

I: inhalation labels, E: exhalation labels, C: continuous adventitious sound labels, D: discontinuous adventitious sound labels, W: wheeze labels, S: stridor labels, and R: rhonchus labels.
