# Supplementary material
Source: MDPI journal article supplement (https://www.mdpi.com/2076-3417/12/15/7623)
Supplement: s1 [file s1]

**Table S1.** Characteristics of co-occurring diseases in the subjects in HF\_Lung\_V2.

|                                            | Subjects from<br>RCC/RCW | Subjects from<br>FEMH | Subjects in<br>TSECCM<br>Database |
|--------------------------------------------|--------------------------|-----------------------|-----------------------------------|
| Number (n)                                 | 25                       | 32                    | 243                               |
| Non-respiratory disease                    |                          |                       |                                   |
| Chronic kidney disease                     | 1 (4%)                   | 5 (16%)               | NA                                |
| Acute kidney injury                        | 3 (12%)                  | 0 (0%)                | NA                                |
| End-stage renal disease                    | 1 (4%)                   | 4 (13%)               | NA                                |
| Chronic heart failure                      | 3 (12%)                  | 7 (22%)               | NA                                |
| Acute heart failure                        | 0 (0%)                   | 2 (6%)                | NA                                |
| Diabetes mellitus                          | 8 (32%)                  | 11 (34%)              | NA                                |
| Hypertension                               | 6 (24%)                  | 17 (53%)              | NA                                |
| Malignancy                                 | 1 (4%)                   | 4 (13%)               | NA                                |
| Arrhythmia                                 | 1 (4%)                   | 0 (0%)                | NA                                |
| Cardiovascular disease                     | 1 (4%)                   | 0 (0%)                | NA                                |
| Cerebral palsy                             | 1 (4%)                   | 0 (0%)                | NA                                |
| Seizure                                    | 1 (4%)                   | 0 (0%)                | NA                                |
| Coronary artery disease                    | 0 (0%)                   | 5 (16%)               | NA                                |
| Atrial fibrillation                        | 0 (0%)                   | 5 (16%)               | NA                                |
| Valvular heart disease                     | 0 (0%)                   | 0 (0%)                | NA                                |
| Degenerative herniated intervertebral disc | 0 (0%)                   | 1 (3%)                | NA                                |
| Ventral hernia                             | 0 (0%)                   | 1 (3%)                | NA                                |
| Bone fracture                              | 0 (0%)                   | 2 (6%)                | NA                                |
| Parkinson's disease                        | 0 (0%)                   | 1 (3%)                | NA                                |
| Myocardial infarction                      | 0 (0%)                   | 4 (13%)               | NA                                |
| Gout                                       | 0 (0%)                   | 2 (6%)                | NA                                |
| Knee osteoarthritis                        | 0 (0%)                   | 1 (3%)                | NA                                |
| Hyperlipidemia                             | 0 (0%)                   | 3 (9%)                | NA                                |
| Ventricular tachycardia                    | 0 (0%)                   | 1 (3%)                | NA                                |
| Urinary tract infection                    | 0 (0%)                   | 1 (3%)                | NA                                |
| Gastroesophageal reflux disease            | 0 (0%)                   | 3 (9%)                | NA                                |
| Colon polyp                                | 0 (0%)                   | 1 (3%)                | NA                                |
| Hepatitis                                  | 0 (0%)                   | 1 (3%)                | NA                                |
| Old stroke                                 | 0 (0%)                   | 5 (16%)               | NA                                |
| Hyperkalemia                               | 0 (0%)                   | 1 (3%)                | NA                                |
| Glaucoma                                   | 0 (0%)                   | 1 (3%)                | NA                                |

|                              |        |        |    |
|------------------------------|--------|--------|----|
| Cataract                     | 0 (0%) | 1 (3%) | NA |
| Esophageal ulcer             | 0 (0%) | 1 (3%) | NA |
| Dementia                     | 0 (0%) | 1 (3%) | NA |
| Gastric ulcer                | 0 (0%) | 1 (3%) | NA |
| Hydrocephalus                | 0 (0%) | 1 (3%) | NA |
| Nephrotic syndrome           | 0 (0%) | 1 (3%) | NA |
| Systemic lupus erythematosus | 0 (0%) | 1 (3%) | NA |
| Acute viral myocarditis      | 0 (0%) | 1 (3%) | NA |
| Depression                   | 0 (0%) | 1 (3%) | NA |
| Hypokalemia                  | 0 (0%) | 1 (3%) | NA |
| Anxiety disorder             | 0 (0%) | 1 (3%) | NA |
| Benign prostatic hyperplasia | 0 (0%) | 1 (3%) | NA |
| Constipation                 | 0 (0%) | 1 (3%) | NA |

NA: Not available.
